# Supplementary material for: Assessment of a Mobile App by Adolescents and Young Adults With Cystic Fibrosis: Pilot Evaluation
Source: PubMed Central journal article supplement (PMC6895868; doi:10.2196/12442), 2019-11-21
Supplement: mhealth_v7i11e12442_app2.pdf [file mhealth_v7i11e12442_app2.pdf]

**FLZ Fragen zur Lebenszufriedenheit**

**1. Allgemeiner Teil**

Bei den folgenden Fragen geht es darum, wie **zufrieden** Sie mit Ihrem Leben und mit den einzelnen Aspekten Ihres Lebens sind. Außerdem sollen Sie angeben, wie **wichtig** einzelne Lebensbereiche (z.B. Beruf oder Freizeit) für Ihre Zufriedenheit und Ihr Wohlbefinden sind.

Bitte beantworten Sie **alle** Fragen, auch diejenigen, die scheinbar nicht auf Sie zutreffen: Wenn Sie z.B. keinen Partner haben, können Sie bei der Frage nach der Partnerschaft trotzdem angeben, wie wichtig Ihnen das wäre und wie zufrieden Sie mit der derzeitigen Situation (ohne Partner) sind.

Lassen Sie sich nicht davon beeinflussen, ob Sie sich im Augenblick gut oder schlecht fühlen, sondern versuchen Sie, bei Ihrer Beurteilung **die letzten vier Wochen** zu berücksichtigen.

**Bitte kreuzen Sie zunächst an, wie wichtig jeder einzelne Lebensbereich für Ihre Zufriedenheit insgesamt ist. Bevor Sie beginnen, schauen Sie bitte erst alle Bereiche an.**

Wie **wichtig** ist für Sie,...

|                                                | nicht                    | etwas                    | ziemlich                 | sehr                     | extrem                   |
|------------------------------------------------|--------------------------|--------------------------|--------------------------|--------------------------|--------------------------|
|                                                | wichtig                  |                          |                          |                          |                          |
| 1) <b>Freunde/ Bekannte</b>                    | <input type="checkbox"/> | <input type="checkbox"/> | <input type="checkbox"/> | <input type="checkbox"/> | <input type="checkbox"/> |
| 2) <b>Freizeitgestaltung/ Hobbies</b>          | <input type="checkbox"/> | <input type="checkbox"/> | <input type="checkbox"/> | <input type="checkbox"/> | <input type="checkbox"/> |
| 3) <b>Gesundheit</b>                           | <input type="checkbox"/> | <input type="checkbox"/> | <input type="checkbox"/> | <input type="checkbox"/> | <input type="checkbox"/> |
| 4) <b>Einkommen/ finanzielle Sicherheit</b>    | <input type="checkbox"/> | <input type="checkbox"/> | <input type="checkbox"/> | <input type="checkbox"/> | <input type="checkbox"/> |
| 5) <b>Beruf/ Arbeit bzw. Schule/Ausbildung</b> | <input type="checkbox"/> | <input type="checkbox"/> | <input type="checkbox"/> | <input type="checkbox"/> | <input type="checkbox"/> |
| 6) <b>Wohnsituation</b>                        | <input type="checkbox"/> | <input type="checkbox"/> | <input type="checkbox"/> | <input type="checkbox"/> | <input type="checkbox"/> |
| 7) <b>Familienleben/ Kinder</b>                | <input type="checkbox"/> | <input type="checkbox"/> | <input type="checkbox"/> | <input type="checkbox"/> | <input type="checkbox"/> |
| 8) <b>Partnerschaft/ Sexualität</b>            | <input type="checkbox"/> | <input type="checkbox"/> | <input type="checkbox"/> | <input type="checkbox"/> | <input type="checkbox"/> |

**Bitte kreuzen Sie nun an, wie zufrieden Sie in den einzelnen Lebensbereichen sind.**

Wie **zufrieden** sind Sie mit ...

|                                                                                                | un-                      | eher un-                 | ziemlich                 | sehr                     |                          |
|------------------------------------------------------------------------------------------------|--------------------------|--------------------------|--------------------------|--------------------------|--------------------------|
|                                                                                                | zufrieden                |                          |                          |                          |                          |
| 1) <b>Freunde/ Bekannte</b>                                                                    | <input type="checkbox"/> | <input type="checkbox"/> | <input type="checkbox"/> | <input type="checkbox"/> | <input type="checkbox"/> |
| 2) <b>Freizeitgestaltung/ Hobbies</b>                                                          | <input type="checkbox"/> | <input type="checkbox"/> | <input type="checkbox"/> | <input type="checkbox"/> | <input type="checkbox"/> |
| 3) <b>Gesundheit</b>                                                                           | <input type="checkbox"/> | <input type="checkbox"/> | <input type="checkbox"/> | <input type="checkbox"/> | <input type="checkbox"/> |
| 4) <b>Einkommen/ finanzielle Sicherheit</b>                                                    | <input type="checkbox"/> | <input type="checkbox"/> | <input type="checkbox"/> | <input type="checkbox"/> | <input type="checkbox"/> |
| 5) <b>Beruf/ Arbeit</b>                                                                        | <input type="checkbox"/> | <input type="checkbox"/> | <input type="checkbox"/> | <input type="checkbox"/> | <input type="checkbox"/> |
| 6) <b>Wohnsituation</b>                                                                        | <input type="checkbox"/> | <input type="checkbox"/> | <input type="checkbox"/> | <input type="checkbox"/> | <input type="checkbox"/> |
| 7) <b>Familienleben/ Kinder</b>                                                                | <input type="checkbox"/> | <input type="checkbox"/> | <input type="checkbox"/> | <input type="checkbox"/> | <input type="checkbox"/> |
| 8) <b>Partnerschaft/ Sexualität</b>                                                            | <input type="checkbox"/> | <input type="checkbox"/> | <input type="checkbox"/> | <input type="checkbox"/> | <input type="checkbox"/> |
| Wie zufrieden sind Sie mit Ihrem Leben <b>insgesamt</b> , wenn Sie alle Aspekte zusammennemen? | <input type="checkbox"/> | <input type="checkbox"/> | <input type="checkbox"/> | <input type="checkbox"/> | <input type="checkbox"/> |

**Question about life-satisfaction\_1. general section**

The following questions address your **satisfaction** with different areas of your life. Additionally, we ask you to estimate the **importance** of these areas in your life (for example professional life or leisure time) for your personal satisfaction and well-being.

Please answer **all** questions, even those apparently not fitting to your situation. If for example you do not have a partner, you can nonetheless estimate how important this could be to you and how satisfied you are with your situation without partner.

Do not let yourself be influenced by acute good or bad feelings but try to evaluate **the last 4 weeks**.

**Please firstly designate the importance of the different areas of life. Please look at all areas before starting to fill out the questionnaire.**

How **important** are/is...

|                                           | <b>not</b> | <b>a little</b> | <b>rather important</b> | <b>very</b> | <b>extremely</b> |
|-------------------------------------------|------------|-----------------|-------------------------|-------------|------------------|
| friends/acquaintances                     |            |                 |                         |             |                  |
| hobbies                                   |            |                 |                         |             |                  |
| health                                    |            |                 |                         |             |                  |
| Income/financial security                 |            |                 |                         |             |                  |
| Professional life/work or school/training |            |                 |                         |             |                  |
| housing situation                         |            |                 |                         |             |                  |
| family life/children                      |            |                 |                         |             |                  |
| partnership/sexuality                     |            |                 |                         |             |                  |

Please now designate your **satisfaction** with the different aspects of life.

How **satisfied** are you with...

|                                                                                       | <b>unhappy</b> | <b>rather unhappy</b> | <b>rather happy</b> | <b>Very happy</b> | <b>extremely happy</b> |
|---------------------------------------------------------------------------------------|----------------|-----------------------|---------------------|-------------------|------------------------|
| friends/acquaintances                                                                 |                |                       |                     |                   |                        |
| hobbies                                                                               |                |                       |                     |                   |                        |
| health                                                                                |                |                       |                     |                   |                        |
| Income/financial security                                                             |                |                       |                     |                   |                        |
| Professional life/work or school/training                                             |                |                       |                     |                   |                        |
| housing situation                                                                     |                |                       |                     |                   |                        |
| family life/children                                                                  |                |                       |                     |                   |                        |
| partnership/sexuality                                                                 |                |                       |                     |                   |                        |
| How happy are you with your life <b>in general</b> if you put all the facts together? |                |                       |                     |                   |                        |
