# Supplementary material for: Assessment of a Mobile App by Adolescents and Young Adults With Cystic Fibrosis: Pilot Evaluation
Source: PubMed Central journal article supplement (PMC6895868; doi:10.2196/12442), 2019-11-21
Supplement: mhealth_v7i11e12442_app3.pdf [file mhealth_v7i11e12442_app3.pdf]

## **FLZ Fragen zur Lebenszufriedenheit**

## **2. Gesundheit**

Im folgenden ist der Bereich Gesundheit in verschiedene Aspekte unterteilt. Sie sollen auch hier wieder angeben, wie **wichtig** Ihnen einzelne Aspekte sind, und wie **zufrieden** Sie damit sind. Bitte beantworten Sie **alle** Fragen. Lassen Sie sich nicht davon beeinflussen, ob Sie sich im Augenblick gut oder schlecht fühlen, sondern versuchen Sie, bei Ihrer Beurteilung **die letzten vier Wochen** zu berücksichtigen.

**Bitte kreuzen Sie zunächst an, wie wichtig jeder einzelne Aspekt für Ihre Gesundheit ist. Bevor Sie beginnen, schauen Sie bitte erst alle Aspekte an.**

| Wie <b>wichtig</b> ist (sind) für Sie,...                   | nicht                    | etwas                    | ziemlich                 | sehr                     | extrem                   |
|-------------------------------------------------------------|--------------------------|--------------------------|--------------------------|--------------------------|--------------------------|
|                                                             | wichtig                  |                          |                          |                          |                          |
| 1) <b>Körperliche Leistungsfähigkeit</b>                    | <input type="checkbox"/> | <input type="checkbox"/> | <input type="checkbox"/> | <input type="checkbox"/> | <input type="checkbox"/> |
| 2) <b>Entspannungsfähigkeit/ Ausgeglichenheit</b>           | <input type="checkbox"/> | <input type="checkbox"/> | <input type="checkbox"/> | <input type="checkbox"/> | <input type="checkbox"/> |
| 3) <b>Energie/ Lebensfreude</b>                             | <input type="checkbox"/> | <input type="checkbox"/> | <input type="checkbox"/> | <input type="checkbox"/> | <input type="checkbox"/> |
| 4) <b>Fortbewegungsfähigkeit ( z.B. gehen, Auto fahren)</b> | <input type="checkbox"/> | <input type="checkbox"/> | <input type="checkbox"/> | <input type="checkbox"/> | <input type="checkbox"/> |
| 5) <b>Seh- und Hörvermögen</b>                              | <input type="checkbox"/> | <input type="checkbox"/> | <input type="checkbox"/> | <input type="checkbox"/> | <input type="checkbox"/> |
| 6) <b>Angstfreiheit</b>                                     | <input type="checkbox"/> | <input type="checkbox"/> | <input type="checkbox"/> | <input type="checkbox"/> | <input type="checkbox"/> |
| 7) <b>Beschwerde- und Schmerzfreiheit</b>                   | <input type="checkbox"/> | <input type="checkbox"/> | <input type="checkbox"/> | <input type="checkbox"/> | <input type="checkbox"/> |
| 8) <b>Unabhängigkeit von Hilfe/ Pflege</b>                  | <input type="checkbox"/> | <input type="checkbox"/> | <input type="checkbox"/> | <input type="checkbox"/> | <input type="checkbox"/> |

**Bitte kreuzen Sie nun an, wie zufrieden Sie in den einzelnen Aspekten sind.**

| Wie <b>zufrieden</b> sind Sie mit Ihrer (Ihrem)...         | un-                      | eher un-                 | ziemlich                 | sehr                     |                          |
|------------------------------------------------------------|--------------------------|--------------------------|--------------------------|--------------------------|--------------------------|
|                                                            | zufrieden                |                          |                          |                          |                          |
| 1) <b>Körperliche Leistungsfähigkeit</b>                   | <input type="checkbox"/> | <input type="checkbox"/> | <input type="checkbox"/> | <input type="checkbox"/> | <input type="checkbox"/> |
| 2) <b>Entspannungsfähigkeit/ Ausgeglichenheit</b>          | <input type="checkbox"/> | <input type="checkbox"/> | <input type="checkbox"/> | <input type="checkbox"/> | <input type="checkbox"/> |
| 3) <b>Energie/ Lebensfreude</b>                            | <input type="checkbox"/> | <input type="checkbox"/> | <input type="checkbox"/> | <input type="checkbox"/> | <input type="checkbox"/> |
| 4) <b>Fortbewegungsfähigkeit (z.B. gehen, Auto fahren)</b> | <input type="checkbox"/> | <input type="checkbox"/> | <input type="checkbox"/> | <input type="checkbox"/> | <input type="checkbox"/> |
| 5) <b>Seh – und Hörvermögen</b>                            | <input type="checkbox"/> | <input type="checkbox"/> | <input type="checkbox"/> | <input type="checkbox"/> | <input type="checkbox"/> |
| 6) <b>Angstfreiheit</b>                                    | <input type="checkbox"/> | <input type="checkbox"/> | <input type="checkbox"/> | <input type="checkbox"/> | <input type="checkbox"/> |
| 7) <b>Beschwerde- und Schmerzfreiheit</b>                  | <input type="checkbox"/> | <input type="checkbox"/> | <input type="checkbox"/> | <input type="checkbox"/> | <input type="checkbox"/> |
| 8) <b>Unabhängigkeit von Hilfe / Pflege</b>                | <input type="checkbox"/> | <input type="checkbox"/> | <input type="checkbox"/> | <input type="checkbox"/> | <input type="checkbox"/> |

### Question about life-satisfaction\_2. health

The following questions address your health, divided into several areas. Again, we ask you to estimate the **importance** of these areas in your life and how **satisfied** you are with them.

Please answer **all** questions.

Do not let yourself be influenced by acute good or bad feelings but try to evaluate **the last 4 weeks**.

**Please firstly designate the importance of the different aspects of your health. Please look at all areas before starting to fill out the questionnaire.**

How **important** are/is...

|                                   | not | a little | rather important | very | extremely |
|-----------------------------------|-----|----------|------------------|------|-----------|
| physical performance              |     |          |                  |      |           |
| relaxation ability/balance        |     |          |                  |      |           |
| energy/vitality                   |     |          |                  |      |           |
| locomotion (walking, driving,...) |     |          |                  |      |           |
| vision and hearing                |     |          |                  |      |           |
| Lack of anxiety                   |     |          |                  |      |           |
| absence of symptoms/pain          |     |          |                  |      |           |
| independence of help/care         |     |          |                  |      |           |

Please now designate your **satisfaction** with the different aspects of your health.

How **satisfied** are you with your...

|                                   | unhappy | rather unhappy | rather happy | quite happy | extremely happy |
|-----------------------------------|---------|----------------|--------------|-------------|-----------------|
| physical performance              |         |                |              |             |                 |
| relaxation ability/balance        |         |                |              |             |                 |
| energy/vitality                   |         |                |              |             |                 |
| locomotion (walking, driving,...) |         |                |              |             |                 |
| vision and hearing                |         |                |              |             |                 |
| Lack of anxiety                   |         |                |              |             |                 |
| absence of symptoms/pain          |         |                |              |             |                 |
| independence of help/care         |         |                |              |             |                 |
