# Supplementary material for: Assessment of a Mobile App by Adolescents and Young Adults With Cystic Fibrosis: Pilot Evaluation
Source: PubMed Central journal article supplement (PMC6895868; doi:10.2196/12442), 2019-11-21
Supplement: mhealth_v7i11e12442_app4.pdf [file mhealth_v7i11e12442_app4.pdf]

**Fragen zur Lebenszufriedenheit mit Mukoviszidose (FLZ-CF)**

**Beurteile bitte folgende Aussagen für die letzten 4 Wochen.**

Wie **wichtig** ist für Dich,...

nicht etwas ziemlich sehr extrem  
wichtig

- |                                                                             |                          |                          |                          |                          |                          |
|-----------------------------------------------------------------------------|--------------------------|--------------------------|--------------------------|--------------------------|--------------------------|
| 1) frei von Atemnot/ Husten zu sein.                                        | <input type="checkbox"/> | <input type="checkbox"/> | <input type="checkbox"/> | <input type="checkbox"/> | <input type="checkbox"/> |
| 2) frei von Bauchschmerzen, Verdauungsbeschwerden zu sein.                  | <input type="checkbox"/> | <input type="checkbox"/> | <input type="checkbox"/> | <input type="checkbox"/> | <input type="checkbox"/> |
| 3) mit Genuss essen zu können.                                              | <input type="checkbox"/> | <input type="checkbox"/> | <input type="checkbox"/> | <input type="checkbox"/> | <input type="checkbox"/> |
| 4) erholsamen Schlaf finden zu können.                                      | <input type="checkbox"/> | <input type="checkbox"/> | <input type="checkbox"/> | <input type="checkbox"/> | <input type="checkbox"/> |
| 5) den normalen Tagesablauf trotz Therapie aufrechtzuerhalten.              | <input type="checkbox"/> | <input type="checkbox"/> | <input type="checkbox"/> | <input type="checkbox"/> | <input type="checkbox"/> |
| 6) Deine tägliche Therapie konsequent durchzuführen.                        | <input type="checkbox"/> | <input type="checkbox"/> | <input type="checkbox"/> | <input type="checkbox"/> | <input type="checkbox"/> |
| 7) von anderen gebraucht zu werden.                                         | <input type="checkbox"/> | <input type="checkbox"/> | <input type="checkbox"/> | <input type="checkbox"/> | <input type="checkbox"/> |
| 8) von Deiner Umgebung Verständnis für Deine Situation gezeigt zu bekommen. | <input type="checkbox"/> | <input type="checkbox"/> | <input type="checkbox"/> | <input type="checkbox"/> | <input type="checkbox"/> |
| 9) keine Benachteiligung durch Deine Erkrankung zu erfahren.                | <input type="checkbox"/> | <input type="checkbox"/> | <input type="checkbox"/> | <input type="checkbox"/> | <input type="checkbox"/> |

**Bitte kreuze nun an, wie zufrieden Du in den einzelnen Aspekten bist.**

Wie **zufrieden** bist Du...

un- eher un- eher ziemlich sehr  
zufrieden

- |                                                             |                          |                          |                          |                          |                          |
|-------------------------------------------------------------|--------------------------|--------------------------|--------------------------|--------------------------|--------------------------|
| 1) mit dem Ausmaß von Atemnot/ Husten.                      | <input type="checkbox"/> | <input type="checkbox"/> | <input type="checkbox"/> | <input type="checkbox"/> | <input type="checkbox"/> |
| 2) mit dem Ausmaß von Bauchschmerzen/Verdauungsbeschwerden. | <input type="checkbox"/> | <input type="checkbox"/> | <input type="checkbox"/> | <input type="checkbox"/> | <input type="checkbox"/> |
| 3) beim Essen.                                              | <input type="checkbox"/> | <input type="checkbox"/> | <input type="checkbox"/> | <input type="checkbox"/> | <input type="checkbox"/> |
| 4) mit Deinem Schlaf.                                       | <input type="checkbox"/> | <input type="checkbox"/> | <input type="checkbox"/> | <input type="checkbox"/> | <input type="checkbox"/> |
| 5) mit der Integration der Therapie in Deinen Tagesablauf.  | <input type="checkbox"/> | <input type="checkbox"/> | <input type="checkbox"/> | <input type="checkbox"/> | <input type="checkbox"/> |
| 6) mit Ihrer Konsequenz bei der täglichen Therapie.         | <input type="checkbox"/> | <input type="checkbox"/> | <input type="checkbox"/> | <input type="checkbox"/> | <input type="checkbox"/> |
| 7) mit der Gewissheit, von anderen gebraucht zu werden.     | <input type="checkbox"/> | <input type="checkbox"/> | <input type="checkbox"/> | <input type="checkbox"/> | <input type="checkbox"/> |
| 8) mit dem Verständnis Deiner Umgebung für Deine Situation. | <input type="checkbox"/> | <input type="checkbox"/> | <input type="checkbox"/> | <input type="checkbox"/> | <input type="checkbox"/> |
| 9) damit, frei von Benachteiligung zu sein.                 | <input type="checkbox"/> | <input type="checkbox"/> | <input type="checkbox"/> | <input type="checkbox"/> | <input type="checkbox"/> |

### Question about life-satisfaction with cystic fibrosis

Please evaluate the following statements for the last 4 weeks.

How **important** is ... for you?

|                                                | <b>not</b> | <b>a little</b> | <b>rather important</b> | <b>very</b> | <b>extremely</b> |
|------------------------------------------------|------------|-----------------|-------------------------|-------------|------------------|
| absence of dyspnoea/coughing                   |            |                 |                         |             |                  |
| absence of stomach pains/digestive disorders   |            |                 |                         |             |                  |
| eating and drinking with pleasure              |            |                 |                         |             |                  |
| finding a deep/restful sleep                   |            |                 |                         |             |                  |
| keeping the daily routine despite therapy      |            |                 |                         |             |                  |
| doing your daily therapy                       |            |                 |                         |             |                  |
| being needed by somebody                       |            |                 |                         |             |                  |
| being understood by your environment           |            |                 |                         |             |                  |
| Lack of discrimination because of your illness |            |                 |                         |             |                  |

Now tick off how satisfied you are with these aspects.

How **satisfied** are you with ...

|                                              | <b>unhappy</b> | <b>rather unhappy</b> | <b>rather happy</b> | <b>quite happy</b> | <b>extremely happy</b> |
|----------------------------------------------|----------------|-----------------------|---------------------|--------------------|------------------------|
| absence of dyspnoea/coughing                 |                |                       |                     |                    |                        |
| absence of stomach pains/digestive disorders |                |                       |                     |                    |                        |
| eating and drinking with pleasure            |                |                       |                     |                    |                        |
| finding a deep/restful sleep                 |                |                       |                     |                    |                        |
| keeping the daily routine despite therapy    |                |                       |                     |                    |                        |
| doing your daily therapy                     |                |                       |                     |                    |                        |
| being needed by somebody                     |                |                       |                     |                    |                        |
| being understood by your environment         |                |                       |                     |                    |                        |
