# Supplementary material for: Assessment of a Mobile App by Adolescents and Young Adults With Cystic Fibrosis: Pilot Evaluation
Source: PubMed Central journal article supplement (PMC6895868; doi:10.2196/12442), 2019-11-21
Supplement: mhealth_v7i11e12442_app5.pdf [file mhealth_v7i11e12442_app5.pdf]

Questionnaire II/Multimedia Appendix 2: Self-developed questionnaire to assess: *Application usage and satisfaction*

**Anonymer Fragebogen zur Nutzung der KIO-App II**

**Frage #1**

Wie häufig hast Du die App benutzt?  
(Bitte nur eine Antwort ankreuzen)

- immer
- häufig
- gelegentlich
- selte
- nie

**Frage #2**

Wie oft hast Du die geschätzt die App aufgerufen?  
(Bitte nur eine Antwort ankreuzen)

- einmal am Tag
- mehrfach am Tag
- einmal in der Woche
- mehrfach in der Woche
- einmal im Monat
- mehrfach im Monat
- einmal im gesamten Zeitraum
- mehrfach im gesamten Zeitraum
- nie

**Frage #3**

Markiere bitte in die untere Zeitleiste mit einem **x**, ab wann Du die App **seltener** als vorher benutzt hast:

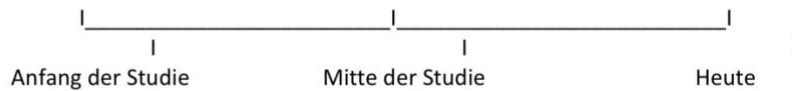

**Frage #4**

Wie lange hast Du Dich durchschnittlich mit der App beschäftigt, wenn Du sie geöffnet hast?  
(Bitte nur eine Antwort ankreuzen)

- sehr lange (eine Stunde und länger)
- lange (halbe Stunde)
- mittel (viertel Stunde)
- kurz (wenige Minuten)
- sehr kurz (wenige Sekunden)

**Frage #5**

Warum hast Du die App nicht weiter genutzt?  
[Freitext]

**Frage #6**

Was hat Dir bei der App gefehlt?  
[Freitext]

**Frage #7:**

Ich fühlte mich durch die App informiert  
(Bitte nur eine Antwort ankreuzen)

- stimme ich zu    stimme ich zum Teil zu    stimme ich nicht zu    weiß nicht

**Frage #8:**

Ich fühlte mich durch die App bevormundet  
(Bitte nur eine Antwort ankreuzen)

- stimme ich zu    stimme ich zum Teil zu    stimme ich nicht zu    weiß nicht

**Frage #9:**

Ich fühlte mich durch die App unterstützt  
(Bitte nur eine Antwort ankreuzen)

stimme ich zu  stimme ich zum Teil zu  stimme ich nicht zu  weiß nicht

**Frage #10:**

Ich fühlte mich durch die App kontrolliert  
(Bitte nur eine Antwort ankreuzen)

stimme ich zu  stimme ich zum Teil zu  stimme ich nicht zu  weiß nicht

**Frage #11:**

Ich fühlte mich durch die App motiviert  
(Bitte nur eine Antwort ankreuzen)

stimme ich zu  stimme ich zum Teil zu  stimme ich nicht zu  weiß nicht

**Frage #12:**

Ich fühlte mich durch die App gelangweilt  
(Bitte nur eine Antwort ankreuzen)

stimme ich zu  stimme ich zum Teil zu  stimme ich nicht zu  weiß nicht

**Frage #13:**

Ich fühlte mich durch die App sicherer  
(Bitte nur eine Antwort ankreuzen)

stimme ich zu  stimme ich zum Teil zu  stimme ich nicht zu  weiß nicht

**Frage #14:**

Ich vertraue der App  
(Bitte nur eine Antwort ankreuzen)

stimme ich zu  stimme ich zum Teil zu  stimme ich nicht zu  weiß nicht

**Frage #15:**

Die App war für mich hilfreich, meine Therapie besser durchzuführen

stimme ich zu  stimme ich zum Teil zu  stimme ich nicht zu  weiß nicht

**Question #1**

How often have you used the application?  
(please chose one answer)

- always
- frequently
- occasionally
- rarely
- never

**Question #2**

How often per day/per month/per three months have you used the application?  
(please chose one answer)

- once per day
- several times per day
- once per week
- several times per week
- once per month
- several times per month
- once the per period
- several times per period

**Question #3**

Please select with “x” on the timeline since when you have reduced your user conduct:

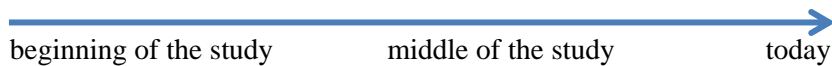**Question #4**

How long have you used the application?  
(please chose one answer)

- very long (one hour and more)
- long (half an hour)
- middle (15 minutes)
- short (a few minutes)
- very short (a few seconds)

**Question #5**

Why have you stopped using the application? (free text)

**Question #6**

What have you missed about the application? (free text)

**Question #7**

I felt informed by the application  
(please chose one answer)

- agree
- partly agree
- disagree
- do not know

**Question #8**

I felt patronized by the application

(please chose one answer)

agree      partly agree      disagree      do not know

**Question #9**

I felt supported by the application  
(please chose one answer)

agree      partly agree      disagree      do not know

**Question #10**

I felt controlled by the application  
(please chose one answer)

agree      partly agree      disagree      do not know

**Question #11**

I felt motivated by the application  
(please chose one answer)

agree      partly agree      disagree      do not know

**Question #12**

I felt bored by the application  
(please chose one answer)

agree      partly agree      disagree      do not know

**Question #13**

I felt safer by the application  
(please chose one answer)

agree      partly agree      disagree      do not know

**Question #14**

I trust the application  
(please chose one answer)

agree      partly agree      disagree      do not know

**Question #15**

The application was helpful to improve management of my therapy  
(please chose one answer)

agree      partly agree      disagree      do not know
