# Supplementary material for: Assessment of a Mobile App by Adolescents and Young Adults With Cystic Fibrosis: Pilot Evaluation
Source: PubMed Central journal article supplement (PMC6895868; doi:10.2196/12442), 2019-11-21
Supplement: mhealth_v7i11e12442_app6.pdf [file mhealth_v7i11e12442_app6.pdf]

Questionnaire I/Multimedia Appendix 1: Systems Usability Scale to assess: *Application usage and satisfaction*

## Anonymer Fragebogen zur Nutzung der KIO-App I

Wir möchten Sie/Dich um eine kurze Einschätzung der Handhabbarkeit (Usability) der KIO- App anhand des unten stehenden Fragebogens bitten. Die Befragung ist anonym, vollkommen freiwillig und in 3 Minuten zu bearbeiten. Ihre/Deine Angaben helfen uns, den Nutzen der Anwendung besser einschätzen zu lernen. Vielen Dank für Ihre/Deine Mithilfe!

| <i>Ausfüllhinweis: Bitte markieren Sie einen der fünf Kreise mit einem „X“ für eine Antwort. In dem Beispiel rechts ist das 4. Feld markiert, was als Antwort einem „stimme zu“ entspräche.</i> | 0             | 0 | 0 | X              | 0 |
|-------------------------------------------------------------------------------------------------------------------------------------------------------------------------------------------------|---------------|---|---|----------------|---|
|                                                                                                                                                                                                 | 1             | 2 | 3 | 4              | 5 |
|                                                                                                                                                                                                 | lehne sehr ab |   |   | stimme sehr zu |   |
| 1. Ich denke, dass ich die Anwendung regelmäßig nutzen möchte.                                                                                                                                  | 0             | 0 | 0 | 0              | 0 |
|                                                                                                                                                                                                 | 1             | 2 | 3 | 4              | 5 |
|                                                                                                                                                                                                 | lehne sehr ab |   |   | stimme sehr zu |   |
| 2. Ich empfand die Anwendung als unnötig kompliziert.                                                                                                                                           | 0             | 0 | 0 | 0              | 0 |
|                                                                                                                                                                                                 | 1             | 2 | 3 | 4              | 5 |
|                                                                                                                                                                                                 | lehne sehr ab |   |   | stimme sehr zu |   |
| 3. Ich fand die Anwendung leicht zu benutzen.                                                                                                                                                   | 0             | 0 | 0 | 0              | 0 |
|                                                                                                                                                                                                 | 1             | 2 | 3 | 4              | 5 |
|                                                                                                                                                                                                 | lehne sehr ab |   |   | stimme sehr zu |   |
| 4. Ich denke, dass ich die Hilfe von einem Techniker bräuchte, um die Anwendung nutzen zu können.                                                                                               | 0             | 0 | 0 | 0              | 0 |
|                                                                                                                                                                                                 | 1             | 2 | 3 | 4              | 5 |
|                                                                                                                                                                                                 | lehne sehr ab |   |   | stimme sehr zu |   |
| 5. Ich denke, dass die verschiedenen Funktionen in der Anwendung gut integriert wurden.                                                                                                         | 0             | 0 | 0 | 0              | 0 |
|                                                                                                                                                                                                 | 1             | 2 | 3 | 4              | 5 |
|                                                                                                                                                                                                 | lehne sehr ab |   |   | stimme sehr zu |   |
| 6. Ich fand, dass es zu viele Widersprüchlichkeiten in der Anwendung gab.                                                                                                                       | 0             | 0 | 0 | 0              | 0 |
|                                                                                                                                                                                                 | 1             | 2 | 3 | 4              | 5 |
|                                                                                                                                                                                                 | lehne sehr ab |   |   | stimme sehr zu |   |
| 7. Ich könnte mir vorstellen, dass die meisten Menschen schnell lernen können, wie die Anwendung funktioniert.                                                                                  | 0             | 0 | 0 | 0              | 0 |
|                                                                                                                                                                                                 | 1             | 2 | 3 | 4              | 5 |
|                                                                                                                                                                                                 | lehne sehr ab |   |   | stimme sehr zu |   |
| 8. Ich empfand die Anwendung als umständlich zu benutzen.                                                                                                                                       | 0             | 0 | 0 | 0              | 0 |
|                                                                                                                                                                                                 | 1             | 2 | 3 | 4              | 5 |
|                                                                                                                                                                                                 | lehne sehr ab |   |   | stimme sehr zu |   |
| 9. Ich fühlte mich in der Benutzung der Anwendung sicher.                                                                                                                                       | 0             | 0 | 0 | 0              | 0 |
|                                                                                                                                                                                                 | 1             | 2 | 3 | 4              | 5 |
|                                                                                                                                                                                                 | lehne sehr ab |   |   | stimme sehr zu |   |
| 10. Ich musste viele Dinge erst lernen bevor ich die Anwendung nutzen konnte.                                                                                                                   | 0             | 0 | 0 | 0              | 0 |
|                                                                                                                                                                                                 | 1             | 2 | 3 | 4              | 5 |
|                                                                                                                                                                                                 | lehne sehr ab |   |   | stimme sehr zu |   |

## Anonymous questionnaire – utilisation of KIO-App I

We would like to briefly obtain your assessment of the usability of the KIO-App by the questionnaire below. The questionnaire is anonymous, voluntary and can be accomplished within 3 minutes. Your assessment will help us to understand the usefulness of the application. Thank you very much for your help.

*How to complete the questionnaire: please mark one of the five circles with an X for your preferred answer. In the example to the right, the fourth circle is marked, corresponding to the answer “agree”.*

|    | <b>statement</b>                                                                       | <b>1</b> | <b>2</b> | <b>3</b> | <b>4</b> | <b>5</b> |
|----|----------------------------------------------------------------------------------------|----------|----------|----------|----------|----------|
| 1  | “I think I will use the application regularly.”                                        |          |          |          |          |          |
| 2  | “I think the application was unnecessarily complicated.”                               |          |          |          |          |          |
| 3  | “I think the application was easy to use.”                                             |          |          |          |          |          |
| 4  | “I think I need a technician’s help to use the application.”                           |          |          |          |          |          |
| 5  | “I believe that the different functions of the application are well integrated.”       |          |          |          |          |          |
| 6  | “I think that there are too many discrepancies in the application.”                    |          |          |          |          |          |
| 7  | “I believe that the most of the people will learn quickly how to use the application.” |          |          |          |          |          |
| 8  | “I think the application was complicated to use.”                                      |          |          |          |          |          |
| 9  | “I felt secure using the application.”                                                 |          |          |          |          |          |
| 10 | “I had to learn a lot until I could use the application.”                              |          |          |          |          |          |

**Legend:**

*1=decline very much, 2=decline, 3=indecisive, 4=agree, 5=agree very much*

J, B. (1996). SUS-A quick and dirty usability scale. Usability Evaluation in Industry. T. B. Jordan PW, Weerdmeester BA, McClelland AL. London, Taylor and Francis.
