# Supplementary material for: Assessment of a Mobile App by Adolescents and Young Adults With Cystic Fibrosis: Pilot Evaluation
Source: PubMed Central journal article supplement (PMC6895868; doi:10.2196/12442), 2019-11-21
Supplement: mhealth_v7i11e12442_app7.pdf [file mhealth_v7i11e12442_app7.pdf]

Questionnaire III/Multimedia Appendix 3: Self-developed questionnaire to assess: *Application usage and satisfaction*

**CF-Transform**

**Fragen zur Nutzung der KIO-APP nach 4 bzw.8 Wochen**

1. Welche Funktionen hast Du in den letzten 4 Wochen genutzt?
  - a) Medikamenteneinnahme/Erinnerungsfunktion
  - b) Tagebuch
  - c) Kontaktmöglichkeit mit dem Arzt
  - d) Design
2. Wie oft hast du die App genutzt in den letzten 4 Wochen genutzt?
  - a) 100 mal
  - b) 50 mal
  - c) weniger
3. Hat sich Dein Nutzungsverhalten in den letzten 4 Wochen verändert?
  - a) Ja
  - b) nein
4. Welche Funktion hältst Du für sinnvoll?
  - a) Medikamenteneinnahme/Erinnerungsfunktion
  - b) Tagebuch
  - c) Kontaktmöglichkeit mit dem Arzt
  - d) Design
5. Welche Funktion nutzt du nicht?
  - a) Medikamenteneinnahme/Erinnerungsfunktion
  - b) Tagebuch
  - c) Kontaktmöglichkeit mit dem Arzt
  - d) Design
6. Welche Funktion fehlt dir bei der App?
  - a) freie Antwort möglich
7. Hast Du jemandem von der App erzählt?
  - a) Ja
  - b) nein
8. Hast du sie jemandem gezeigt/vorgezeigt?
  - a) Ja
  - b) nein
9. Ist die Erinnerungsfunktion ein Störfaktor in deinem Alltag?
  - a) Ja
  - b) nein
10. Stellst du dir vor die App nach dem Ende der Studie weiter zu verwenden?
  - a) Ja
  - b) nein

**CF-Transform**

**Question about the use of the KIO-APP after 4 and 8 weeks**

1. Which function of the application have you used in the last 4 weeks?
  - a) medication memory

- b) diary
- c) contact
- d) design

2. How often have you used the application in the last 4 weeks?

- a) 100 times
- b) 50 times
- c) Less

3. Has your user conduct changed in the last 4 weeks?

- a) yes
- b) no

4. Which functions do you think are useful?

- a) medication memory
- b) diary
- c) contact
- d) design

5. Which function don't you use?

- a) medication memory
- b) diary
- c) contact
- d) design

6. Which function do you miss? (free text)

7. Have you told anybody about the application?

- a) yes
- b) no

8. Have you shown anyone the application?

- a) yes
- b) no

9. Is the memory function a disruptive factor in your everyday life?

- a) yes
- b) no

10. Can you imagine to use the application after finishing the study?

- a) yes
- b) no
